# Supplementary material for: A new lidar inversion method using a surface reference target.Application to the backcattering coefficient and lidar ratio retrievalsof a fog-oil plume at short-range
Source: Copernicus journal article supplement (doi:10.5194/amt-2019-315), 2019-10-07
Supplement: Supplementary file [file amt-2019-315-AC3-supplement.pdf]

## Response to Referee #1

Many thanks to referee for take in time to evaluate and improve this manuscript. Thank also for your recommendation of publication. Please find below point by point responsive to comments.

1) In this paper, the authors include the surface reflectance in the lidar equation and derive its inversion. The derivation of the inversion itself is new as far as I can tell. Section 2 includes the standard volumetric lidar equation with an additive term which was already derived in (Kavaya et al. AO 1983) or similar derivations (Josset et al. OE 2010). The inclusion of an additive term is trivial. The meaning of the equation and what is being done with it (determination of instrumental constant, lidar ratio retrieval) is not new either. This has been proposed and done by (O' Connor JAOT 2004, Hu IEEE GRSL 2007) with a different kind of target (water clouds). With a surface reference target there's relevant discussions by (Josset et al. IEEE GRSL 2010, IEEE TGRS 2018). However, I believe there is value in the formal derivation of the inversion and that the methodology could be applied to a standardized calibration of lidar systems with more descriptions of the field experiment. I suggest a major review. The changes are suggest are not necessarily difficult to implement but I would like the authors to think carefully and take the time needed to present a significantly revised version of the manuscript. Several key references are missing. This paper seems surprisingly out of context of relevant research. The inclusion of these references could strengthen its content.

The originality of our works lies in two points. Firstly, the use of a surface target as a reference in the formalism of lidar inversion commonly called Klett inversion. Second, a simple method to identify the lidar ratio with two lidar measurements from the echo on a surface target in the presence and absence of a volume target under study (without coupling to other instruments). Suggested comments and references (in the general and specific remarks) have been taken into account to better situate our work in relation to the state of the art.

2) The description of the experiment (section 5) lacks details. It makes it harder to understand the domain of validity and application of the methodology.

Paraph add (p16. Line 264-274): *"In order to increase the SNR, we preprocess the measurements from three lidar measurements:*

*Signal 1. The first measurement is made by occulting the emitted laser beam to get a measure of the background scene (contribution of passive illumination);*

*Signal 2. The second measurement is made by occulting the telescope to estimate the electronic noise of darkness of the instrument;*

*Signal 3. The last measurement is made without any occultation.*

*For a given acquisition period, these three series of measured signals are averaged. The average signals of the background radiation and the electronic noise (signals 1 and 2) are subtracted from the signal 3."*

Paragraph revised (p.17 line 278-282): *"The high-speed sampling gives a measurement point every 5 cm on the line of sight of the lidar. Combined with a short pulse duration of the laser source (1.7 ns), this makes it possible to highlight local variations in concentration in the plume volume with the presence of two maxima at 38m and 39m. The backscatter peak of the surface target is also well sampled. The signal amplitude corresponding to the backscatter of the SRT is lower on  $V_{sv}$  than on  $V_s$  because of the presence of the oil plume."*

3) I believe that several statements made in the paper are wrong (see some minor comments). These statements are mostly in the context and perspectives so they do not directly impact the core of the presented work. It could be related to the lack of references.

All the remarks and suggested references have been taken into account so that there is no longer any confusion.

4) p.2 line 27 I would suggest to add more references on lidar calibration based on molecular backscattering. One recent example related to the CALIPSO lidar would be (Kar et al. AMT 2018).

Sentence added (p2. line 28-30): *“This calibration layer can be very high in altitude; it has recently been moved from the upper troposphere (30-34km) to the lower stratosphere (36-39km) for the CALIPSO spatial lidar to reduce inversion uncertainties (Getzewich et al., 2018; Kar et al., 2018).”*

5) p.2 line 52 “It is worth indicating that coupling lidar and sunphotometer measurements is possible only daytime while Raman measurements are carried out preferentially at nighttime in order to increase the SNR.” This is correct but the statement does not apply to the work of (Hu et al. IEEE GRSL 2007, etc). Please rephrase after more references are added to the manuscript.

Paragraph added (p3 line 56-63): *“A fourth method consists in the determination of the optical thickness and lidar ratio of transparent layers located above opaque clouds (Hu et al., 2007; Young, 1995) that are used as reference for calibration in the inversion process (O’Connor et al., 2004). This method is used for downlooking lidar measurements capable of measuring depolarization ratios. However, the method is limited to lidar systems in non-polarized detection, or for lidar measurements for which clouds cannot be used as a reference. A fifth approach consists in the determination of the optical thickness of the atmosphere from the sea surface echo by combining lidar and radar measurements (Josset et al., 2008, 2010b). This method has been used to find the lidar ratio and the optical depth of aerosol layers over oceans (Dawson et al., 2015; Josset et al., 2012; Painemal et al., 2019)”*

Sentence revised (p3. Line 79): *“Also a new technique to retrieve the lidar ratio without using any sunphotometer, Raman or radar measurements is presented and applied to an aerosol plume.”*

6) p. 3 line 76 I’m not sure that I understand why the SRT is assumed to be Lambertian here. As far as I can tell, the formalism you derive is valid for any surface reflectance. It is a wrong assumption to make that natural surfaces are Lambertian, please include (Breon et al. JGR 2002) in the references. Limiting the formalism to Lambertian surfaces seriously limits the usefulness of this research. If one of the equation explicitly requires the surface to be Lambertian. Please state it explicitly in the manuscript.

Sentence revised (p3 line 85-86): *“In our approach, we propose to use a SRT of known bidirectional reflectance distribution function (BRDF)  $f_{r,\lambda}$  (in  $sr^{-1}$ ) (Kavaya et al., 1983; Nicodemus, 1965).”*

Sentence added (p4. Line94-96): *“It should be noted that in the particular case of a Lambertian surface  $f_{r,\lambda}(r_s, \theta_i)$  can be easily expressed by spectral bidirectional reflectance factor  $\rho_\lambda$  from  $\rho_\lambda \cos \theta_i / \pi$  (Haner et al., 1998; Josset et al., 2010a, 2018). However, the general form of BRDF ( $f_{r,\lambda}$ ) will be considered later in this work in order to not restrict the approach to specific cases.”*

7) Eq. 1 I don’t understand why  $F_{cor}$  is not applied to the volumetric target. Please clarify.

Sentence add (p4. Line 102): *“The factor does not apply to the volume part of the lidar equation, because in this expression the pulse profile is approximated to be constant over a rate duration  $\tau_\lambda$ . This approximation cannot be made on the backscatter peak of a surface target, because the backscattered energy is not integrated over a volume.”*

8) Eq. 1 Fcor definition is on page 4, please define quantities the first time they are used.

We have moved Fcor definition the first time there is used (p4. Line 99)

9) p.4 line 105 the statement is confusing (beta missing, definition of the lidar ratios lines 91 and 92 ok).

We want to remove the extinction dependence of Eq 3. in order to solve it. For this we use the expression of the lidar ratio defined (now p4. line 112-113).

10) p.5 In Eq (8) it could help to clarify that  $Y(r_s) = 0$  (only surface at  $r_s$ ).

Sentence revised (p6. Line 140): *"It is worth mentioning that  $LR_a(r_s)$  is the lidar ratio just before the SRT and  $Y(r_s) = 0$  (only surface target)."*

11) Eq (9) clarify that it applies only before the surface. About my two previous comments: in general, it is not very clear that there are two separate domains (as a function of range) for the equation.

Sentence revised (p6. Line 143): *"This equation applies only before the surface target and can be solved by integrating both sides from  $r$  to  $r_s$  (Vande Hey, 2014)."*

12) p. 6 I'm not sure if there's a typo in Eq (13) or if I'm missing something. Please rephrase the comment right before Eq (13). It could help to clarify the matter.

Sentence revised (p6. Line 150-151): *"Multiplying the numerator and the denominator of the first term on the right-hand side of the subtraction by  $D(r_s; 0)$ , this expression becomes:"*

13) p. 16 line 242 How do you know the reflectance of the Lambertian surface? More detail are needed to describe this experiment (see major comment). Please expand this section.

Sentence added (p16. Line 263-265): *"A Lambertian Zenithal SRT (SphereOptics) with a  $f_r = 0.20/\pi$  is placed at 52 m far away from the source. Its spectral bidirectional reflectance has been checked using laboratory bench measurements (Ceolato et al., 2012). The mean direction of the laser beam is parallel to the normal of the surface."*

14) line 243 "than 100 signals in 0.1s (1 kHz)" This is redundant. Please remove or rephrase.

Sentence revised (p16. Line 266-267): *"The laser source has repetition frequency of 1kHz. In order to increase the SNR, we preprocess the measurements from three lidar measurements:"*

15) p. 19 line 287 "Indeed, BRDF are often considered as Lambertian for natural targets (surface roughness, vegetation...), so it can be replaced by SRT reflectance." I believe it is a wrong assumption, I'm again referring to (Breon et al. JGR 2002). Recent research could imply that using reference measurements out of the hotspot would be ok for a lidar (Josset et al. IEEE TGRS 2018) but please rephrase this statement.

Paraph revised (p19. line 324-328): *"Even if some models exist to model the BRDF of surfaces (Bréon et al., 2002; Lobell and Asner, 2002; Mishchenko et al., 1999), their use seems difficult to implement, given the diversity of possible surfaces during airborne campaigns. Nevertheless, it may be possible to identify the reflectance of the ground surface from and the spectroradiometer imager (Josset et al., 2018; Miesch et al., 2005; Poutier et al., 2002). The combination of these results with the herein proposed inversion method would a priori be complementary to establish new methods of calibration for downlooking lidar measurements (spaceborne or airborne lidars)."*
